# Supplementary material for: Embodied Greenhouse Gas Emissions in Diets
Source: PubMed Central journal article supplement (PMC3655165; doi:10.1371/journal.pone.0062228), 2013-05-15

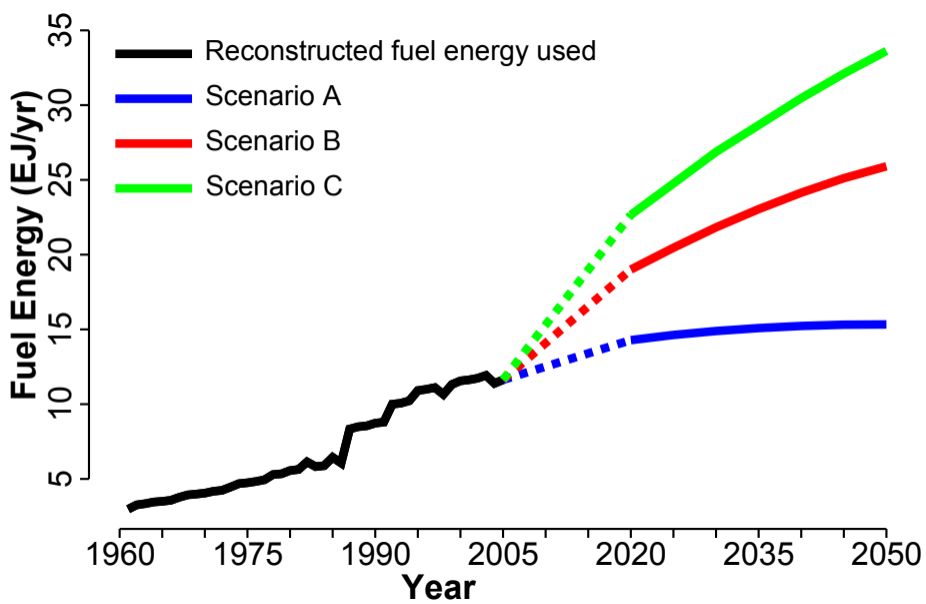

Supplement: pone.0062228.s003.pdf [file pone.0062228.s003.pdf]
