# Supplementary material for: Embodied Greenhouse Gas Emissions in Diets
Source: PubMed Central journal article supplement (PMC3655165; doi:10.1371/journal.pone.0062228), 2013-05-15
Supplement: pone.0062228.s006.pdf [file pone.0062228.s006.pdf]

**Table S1.** Number of observed diet transitions. The counts on the diagonal represent unchanged dietary patterns. Counts greater than 10 are used to plot the transition graph (Figure 4). Read from row to column, e.g. change recorded for Pattern 4  $\rightarrow$  Pattern 5 is 27.

| Pattern | 1   | 2   | 3   | 4   | 5   | 6   | 7   | 8   | 9   | 10  | 11  | 12  | 13  | 14  | 15  | 16  |
|---------|-----|-----|-----|-----|-----|-----|-----|-----|-----|-----|-----|-----|-----|-----|-----|-----|
| 1       | 640 | 0   | 6   | 34  | 14  | 0   | 9   | 2   | 1   | 0   | 0   | 0   | 0   | 0   | 0   | 0   |
| 2       | 0   | 131 | 0   | 0   | 0   | 0   | 0   | 2   | 0   | 0   | 0   | 0   | 0   | 0   | 0   | 0   |
| 3       | 8   | 0   | 463 | 0   | 0   | 0   | 1   | 4   | 0   | 0   | 0   | 0   | 0   | 0   | 0   | 0   |
| 4       | 19  | 0   | 0   | 901 | 27  | 0   | 5   | 0   | 1   | 17  | 0   | 0   | 0   | 0   | 0   | 0   |
| 5       | 6   | 0   | 0   | 16  | 945 | 16  | 9   | 0   | 0   | 9   | 36  | 4   | 1   | 1   | 0   | 0   |
| 6       | 1   | 0   | 0   | 0   | 15  | 610 | 0   | 2   | 0   | 0   | 29  | 7   | 3   | 3   | 0   | 0   |
| 7       | 7   | 0   | 0   | 5   | 7   | 1   | 302 | 0   | 1   | 1   | 0   | 2   | 0   | 0   | 0   | 0   |
| 8       | 1   | 1   | 3   | 0   | 0   | 5   | 0   | 150 | 0   | 0   | 0   | 0   | 0   | 0   | 0   | 0   |
| 9       | 1   | 0   | 0   | 1   | 1   | 0   | 1   | 0   | 323 | 0   | 0   | 1   | 0   | 0   | 0   | 0   |
| 10      | 0   | 0   | 0   | 3   | 10  | 0   | 0   | 0   | 0   | 440 | 3   | 9   | 15  | 0   | 0   | 0   |
| 11      | 0   | 0   | 0   | 0   | 16  | 16  | 1   | 0   | 0   | 3   | 700 | 13  | 12  | 7   | 2   | 0   |
| 12      | 0   | 0   | 0   | 1   | 1   | 5   | 1   | 0   | 1   | 5   | 12  | 567 | 2   | 11  | 15  | 9   |
| 13      | 0   | 0   | 0   | 0   | 0   | 2   | 0   | 0   | 0   | 8   | 4   | 2   | 409 | 0   | 0   | 7   |
| 14      | 0   | 0   | 0   | 0   | 0   | 2   | 0   | 0   | 0   | 0   | 5   | 14  | 1   | 647 | 29  | 1   |
| 15      | 0   | 0   | 0   | 0   | 0   | 0   | 0   | 0   | 0   | 0   | 1   | 6   | 0   | 12  | 848 | 14  |
| 16      | 0   | 0   | 0   | 0   | 0   | 0   | 0   | 0   | 0   | 0   | 0   | 5   | 4   | 0   | 10  | 205 |
