# Supplementary material for: Embodied Greenhouse Gas Emissions in Diets
Source: PubMed Central journal article supplement (PMC3655165; doi:10.1371/journal.pone.0062228), 2013-05-15
Supplement: pone.0062228.s007.pdf [file pone.0062228.s007.pdf]

**Table S2.** Topographical product and data reconstruction rates for SOM maps of certain dimensions. The map configuration with an optimal neighborhood preservation ( $4 \times 2 \times 2$ ) indicated by a topographical product  $\equiv 0$  is used for further analysis (cf. arrow). It describes the 12-dimensional input manifold by a 3-dimensional embedding space and a data reconstruction of 70%.

| $d_{SOM}$ | Network geometry               | Topographical product | Reconstruction Rate |
|-----------|--------------------------------|-----------------------|---------------------|
| 1         | 8                              | $-0.022 \pm 0.003$    | $0.68 \pm 0.0006$   |
| 2         | $4 \times 2$                   | $-0.014 \pm 0.004$    | $0.68 \pm 0.0003$   |
| 1         | 10                             | $-0.019 \pm 0.002$    | $0.69 \pm 0.0003$   |
| 2         | $5 \times 2$                   | $-0.015 \pm 0.002$    | $0.69 \pm 0.0002$   |
| 1         | 12                             | $-0.013 \pm 0.001$    | $0.70 \pm 0.0002$   |
| 2         | $4 \times 3$                   | $-0.014 \pm 0.002$    | $0.70 \pm 0.0002$   |
| 2         | $6 \times 2$                   | $-0.023 \pm 0.002$    | $0.70 \pm 0.0003$   |
| 3         | $3 \times 2 \times 2$          | $-0.001 \pm 0.002$    | $0.70 \pm 0.0002$   |
| 1         | 14                             | $-0.012 \pm 0.001$    | $0.71 \pm 0.0003$   |
| 2         | $7 \times 2$                   | $-0.024 \pm 0.002$    | $0.71 \pm 0.0002$   |
| 1         | 16                             | $-0.010 \pm 0.001$    | $0.71 \pm 0.0002$   |
| 2         | $4 \times 4$                   | $-0.005 \pm 0.001$    | $0.72 \pm 0.0003$   |
| 2         | $8 \times 2$                   | $-0.022 \pm 0.002$    | $0.72 \pm 0.0002$   |
| 3         | $4 \times 2 \times 2$          | $0.002 \pm 0.001$     | $0.72 \pm 0.0005$ ← |
| 4         | $2 \times 2 \times 2 \times 2$ | $0.035 \pm 0.003$     | $0.72 \pm 0.0003$   |
| 1         | 20                             | $-0.011 \pm 0.001$    | $0.71 \pm 0.0004$   |
| 2         | $5 \times 4$                   | $-0.023 \pm 0.002$    | $0.73 \pm 0.0003$   |
| 2         | $10 \times 2$                  | $-0.028 \pm 0.003$    | $0.73 \pm 0.0002$   |
| 3         | $5 \times 2 \times 2$          | $-0.015 \pm 0.002$    | $0.73 \pm 0.0003$   |
| 1         | 24                             | $-0.015 \pm 0.002$    | $0.71 \pm 0.0004$   |
| 2         | $6 \times 4$                   | $-0.028 \pm 0.002$    | $0.74 \pm 0.0002$   |
| 2         | $12 \times 2$                  | $-0.020 \pm 0.002$    | $0.74 \pm 0.0003$   |
| 3         | $4 \times 3 \times 2$          | $-0.016 \pm 0.002$    | $0.74 \pm 0.0002$   |
| 4         | $3 \times 2 \times 2 \times 2$ | $0.009 \pm 0.001$     | $0.74 \pm 0.0003$   |
